# Supplementary material for: Pyrroline-5-carboxylate reductase 1 (PYCR1) upregulation contributes to gastric cancer progression and indicates poor survival outcome
Source: PubMed Central journal article supplement — Ann Transl Med. 2020 Aug;8(15):937. doi: 10.21037/atm-19-4402 (PMC7475402; doi:10.21037/atm-19-4402), 2020-08
Supplement: atm-08-15-937-dss.pdf [file atm-08-15-937-dss.pdf]

## Data Sharing Statement

|                     |                                                                                                                                                    |                                                                                                     |
|---------------------|----------------------------------------------------------------------------------------------------------------------------------------------------|-----------------------------------------------------------------------------------------------------|
| <b>Article Info</b> | <a href="http://dx.doi.org/10.21037/atm-19-4402">http://dx.doi.org/10.21037/atm-19-4402</a>                                                        |                                                                                                     |
| <b>Item</b>         | <b>Question</b>                                                                                                                                    | <b>Authors' Response<br/>(place "-" if not applicable)</b>                                          |
| 1                   | Would you like to share data collected for your study to others?                                                                                   | Yes                                                                                                 |
| 2                   | If not, would you like to share the reason for your decision?                                                                                      | -                                                                                                   |
| 3                   | What data in particular will be shared?                                                                                                            | All original data and study protocol will be shared when they are requested properly.               |
| 4                   | Any other documents will be share? Such as study protocol, statistical analysis plan, informed consent form, clinical study report, analytic code. | -                                                                                                   |
| 5                   | When will data availability begin?                                                                                                                 | Data will be available on request.                                                                  |
| 6                   | When will data availability end?                                                                                                                   | -                                                                                                   |
| 7                   | To whom will you share the data?                                                                                                                   | Anyone who is interested in our research and would like to promote research progress in this filed. |
| 8                   | For what type of analysis or purpose?                                                                                                              | For academic communication only.                                                                    |
| 9                   | How or where can the data/documents be obtained?                                                                                                   | All data can be obtained from the corresponding author.                                             |
| 10                  | Any other restrictions?                                                                                                                            | -                                                                                                   |
